# Supplementary material for: Impacts of Climate Change on River Flows in the Upper Indus Basin and Its Subbasins
Source: Research Square preprint supplement (doi:10.21203/rs.3.rs-404691/v1), 2021-04-20
Supplement: Supplementary file 1 [file ae12f1ace0d8dc457c35e193.docx]

**SUPPLEMENTARY MATERIAL**
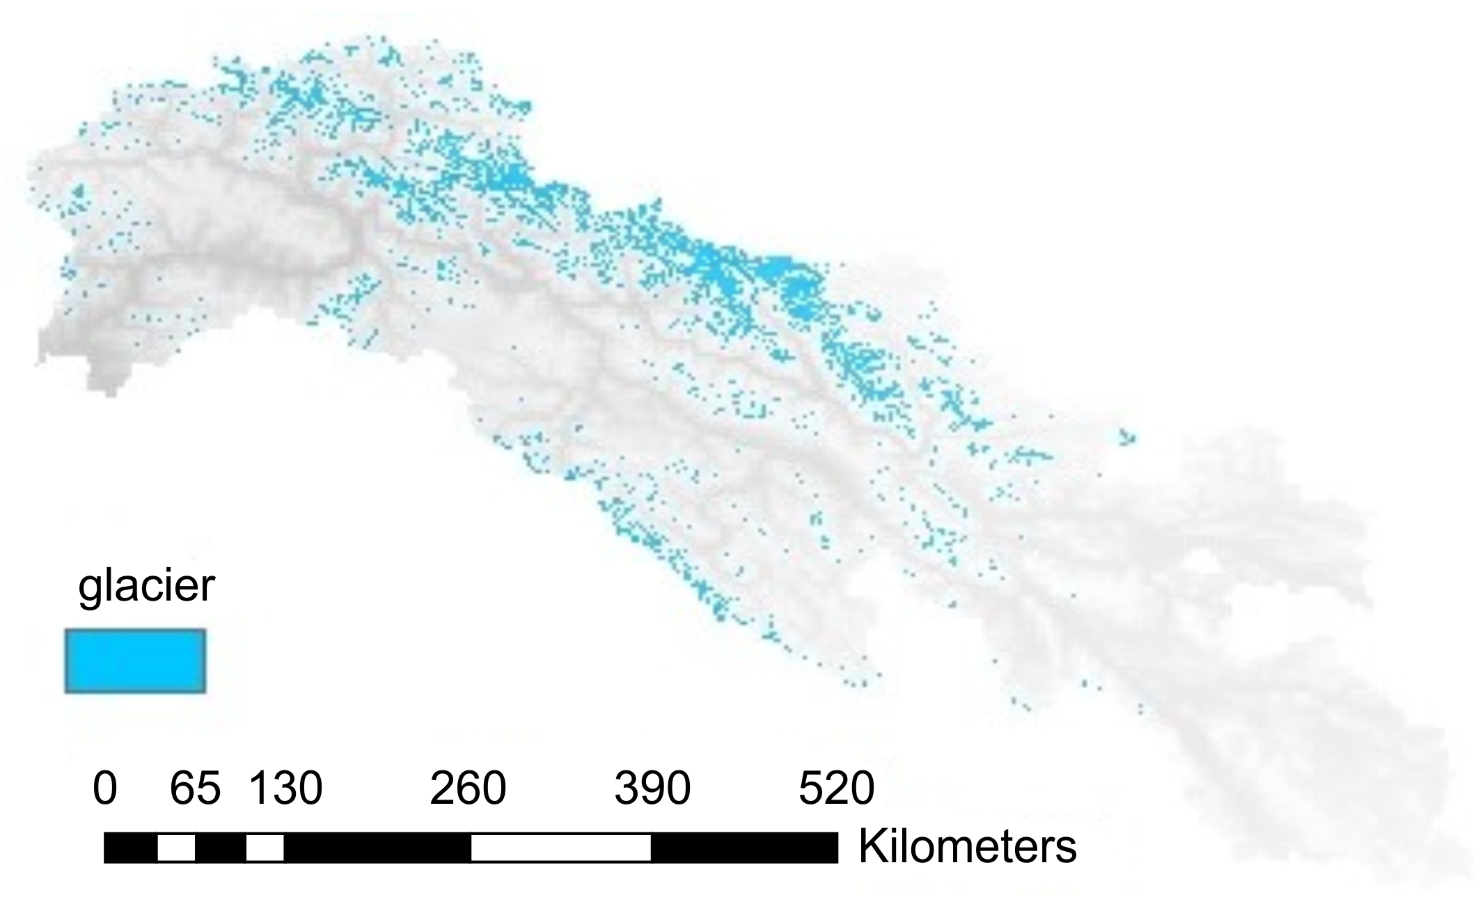


**Fig. S1 a.** Spatial distribution of glaciers in the Upper Indus River Basin.


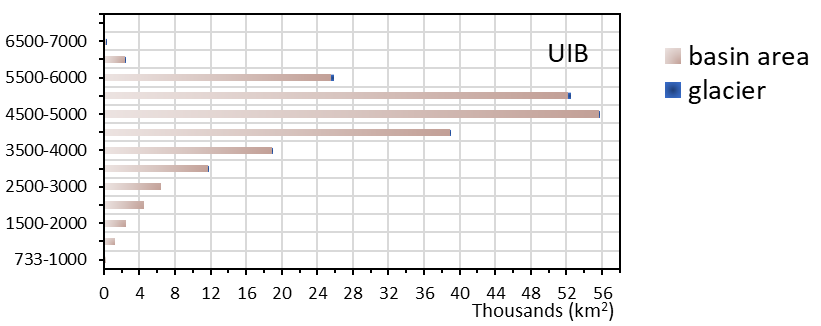

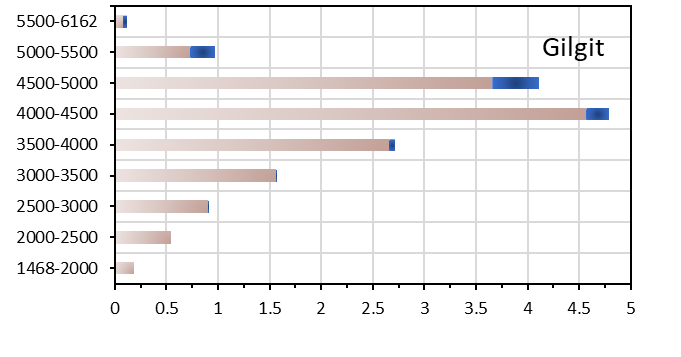

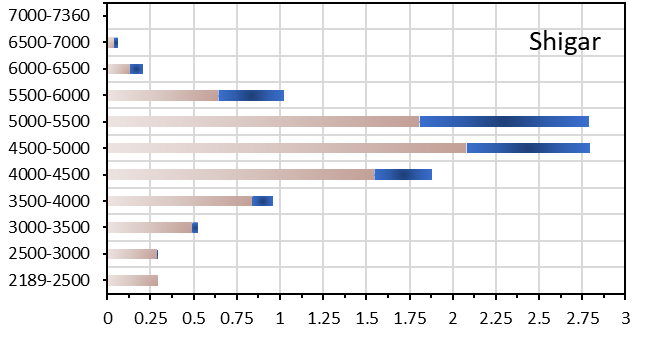

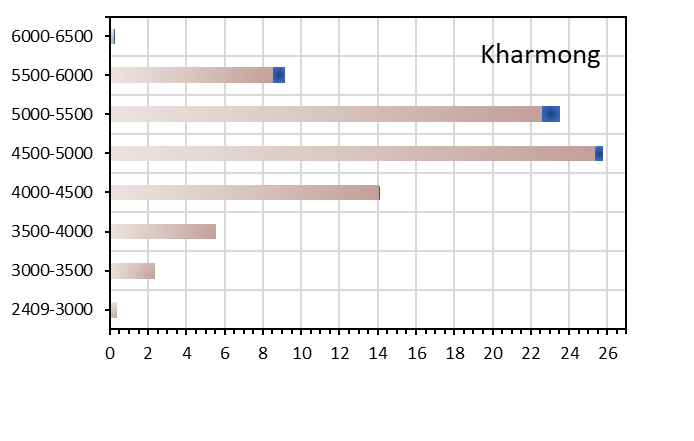


**Fig. S1 b**. Distribution of basin and glacier areas along elevations in the Upper Indus River Basin and subbasins.

Elevation (m)

Elevation (m)

Elevation (m)

Elevation (m)





**Fig. S2.** Observed monthly average discharge at Bisham Qila (1980-2005).





**Fig. S3.** Percentage of exceedance of daily discharge at Bisham Qila (1980–2005).





**Fig. S4.** Average monthly temperature and precipitation in the Upper Indus River Basin (1980–2005).





**Fig. S5.** Average of glacier area change in the Upper Indus River Basin according to GCMs used by Huss and Hock (2015).


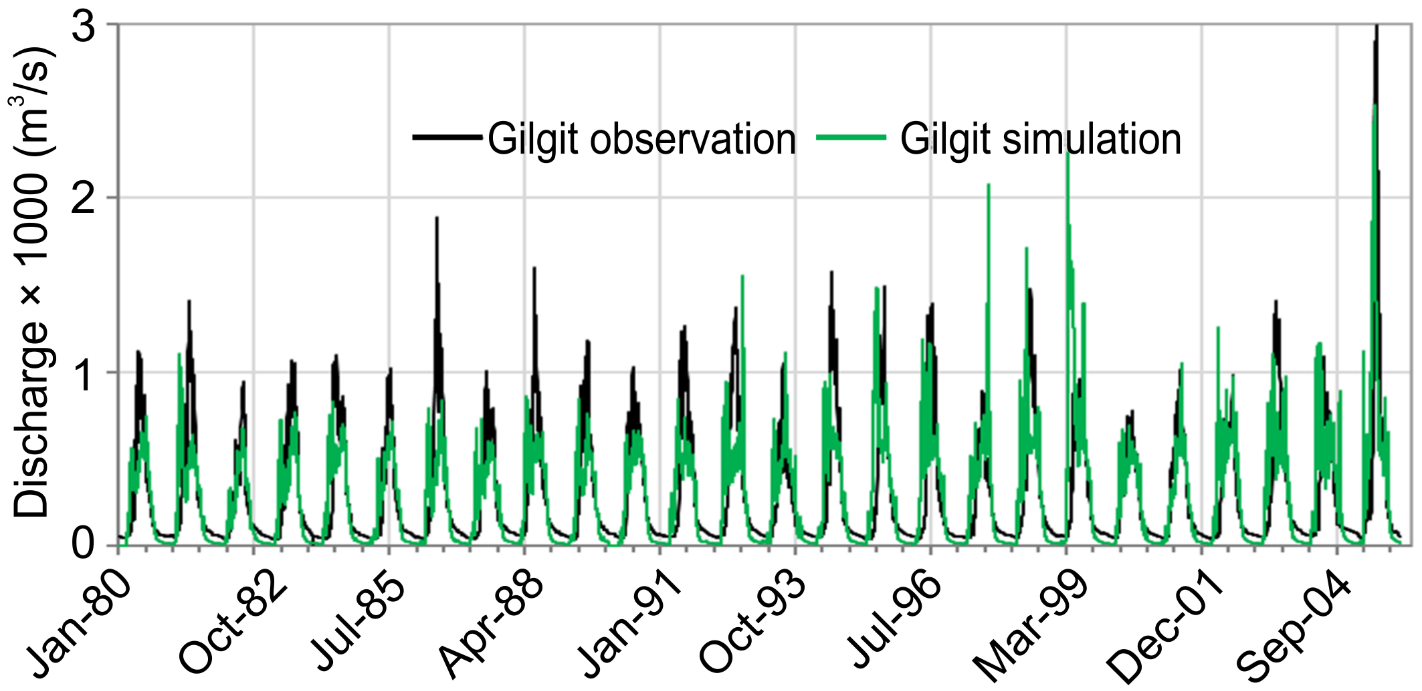


**Fig. S6.** Validation results of hydrological model at Gilgit (1980–2005).


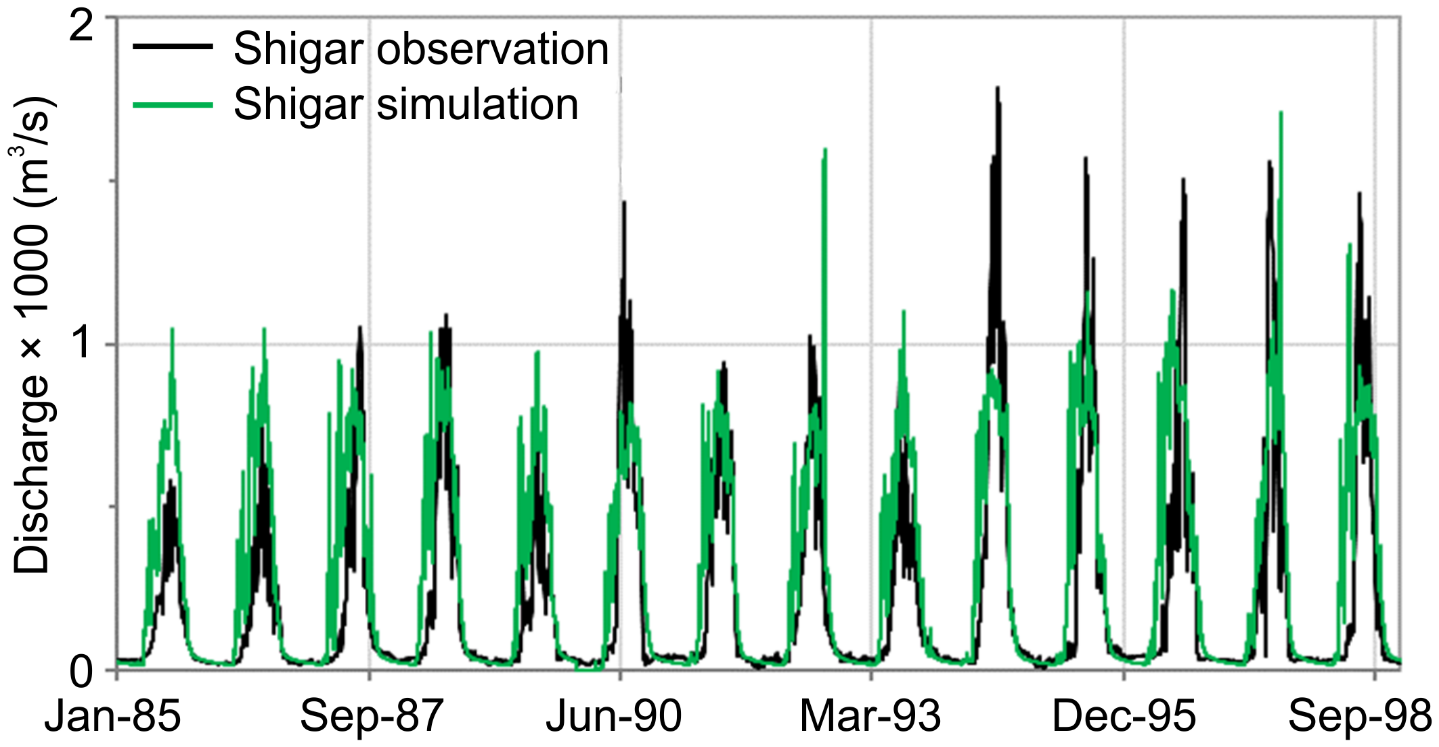


**Fig. S7.** Validation results of hydrological model at Shigar (1985–1998).


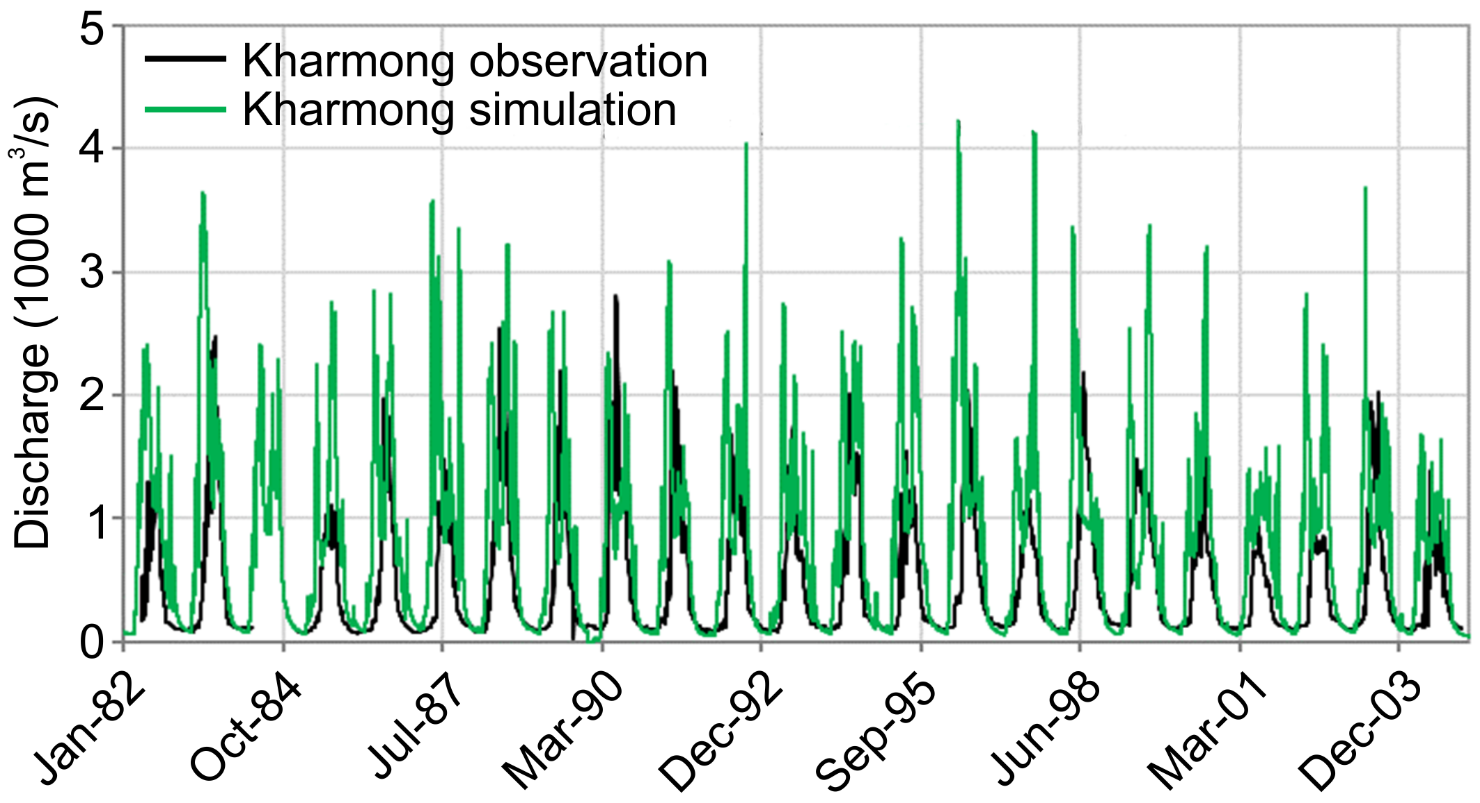


**Fig. S8.** Validation results of hydrological model at Kharmong (1982–2003).


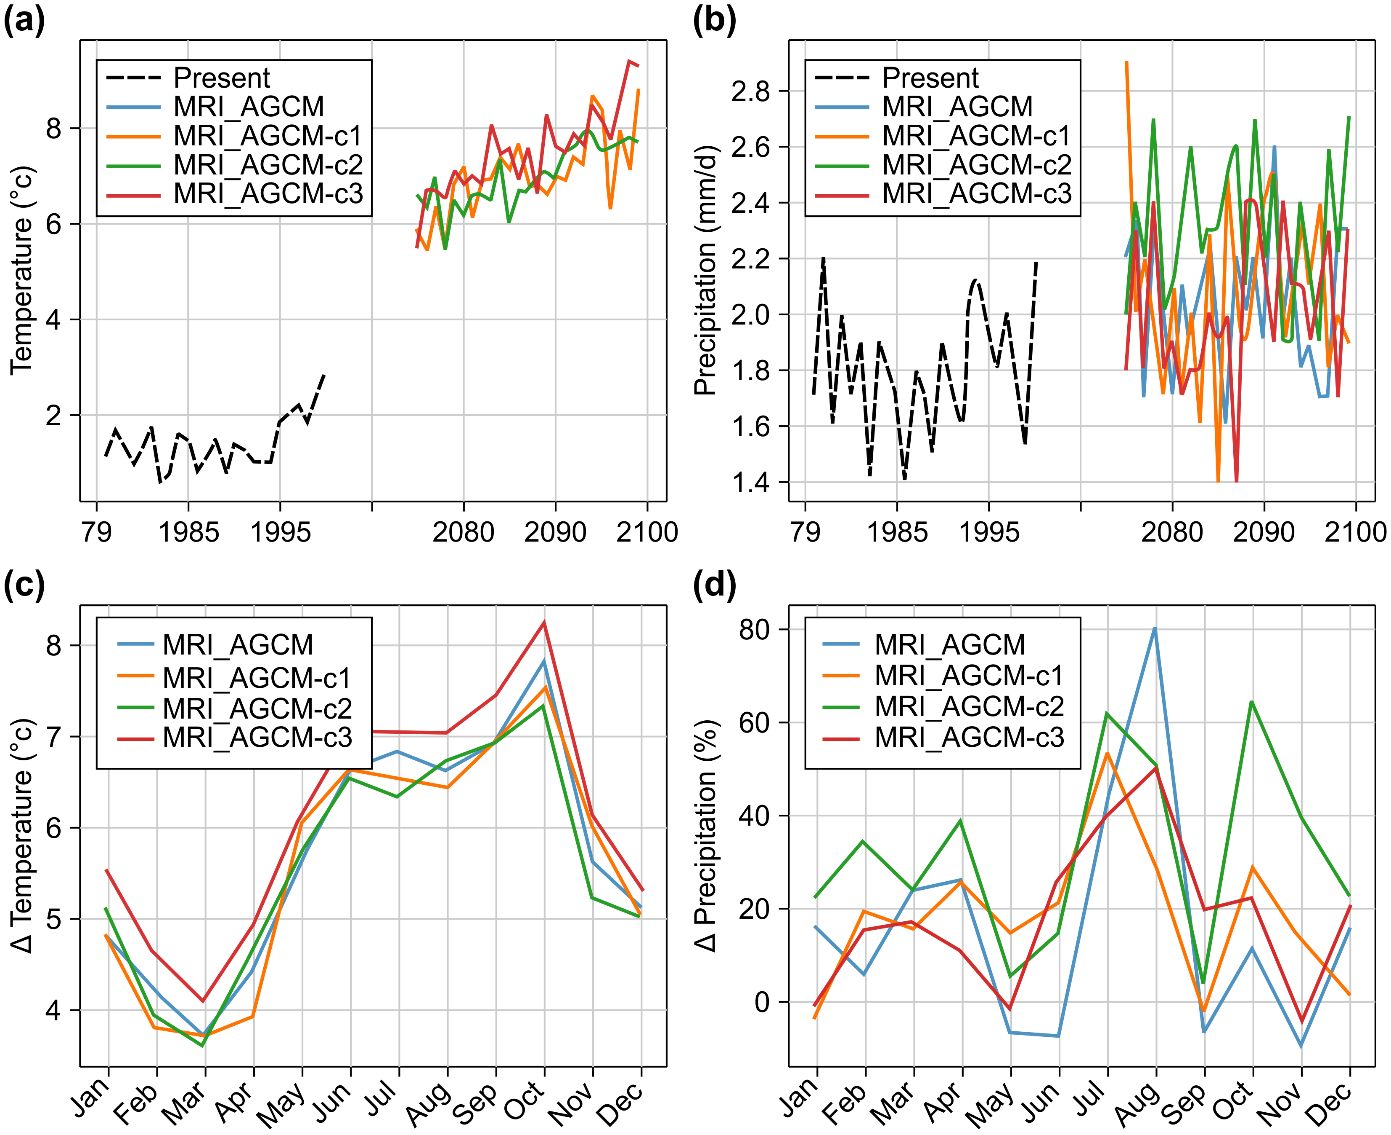


**Fig. S9.** Change in (a) temperature and (b) precipitation across the Upper Indus River Basin according to MRI-AGCM. Change in (c) temperature and (d) precipitation on a monthly basis.
